# Supplementary material for: The BEACH Protein LRBA Promotes the Localization of the Heterotrimeric G-protein Golf to Olfactory Cilia
Source: PubMed Central journal article supplement (PMC5559528; doi:10.1038/s41598-017-08543-4), 2017-08-16
Supplement: 41598_2017_8543_MOESM1_ESM.pdf [file 41598_2017_8543_MOESM1_ESM.pdf]

## Supplementary Figures

Title:

**The BEACH Protein LRBA Promotes the Localization of the Heterotrimeric G-protein G<sub>olf</sub> to Olfactory Cilia**

Authors:

Stefan Kurtenbach, Andreas Gießl, Siv Strömberg, Jan Kremers, Jenny Atorf, Sebastian Rasche, Eva M. Neuhaus, Denis Hervé, Johann Helmut Brandstätter, Esther Asan, Hanns Hatt, and Manfred W. Kilimann

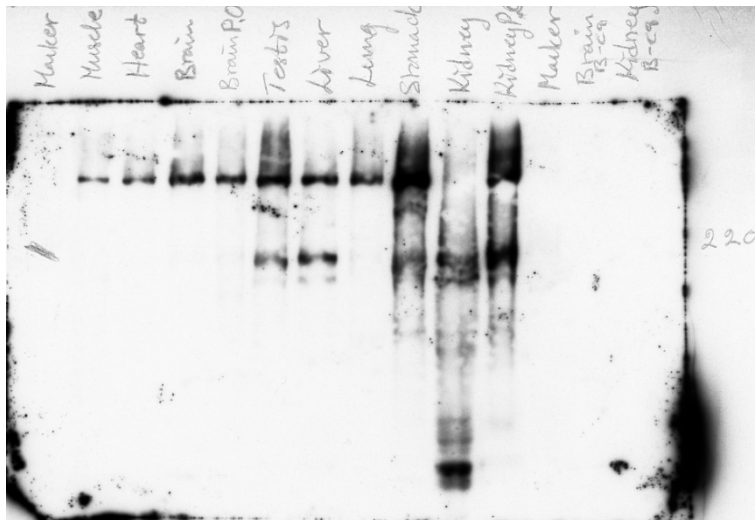

### Supplementary Figure 1.

Unprocessed ECL film of the multi-tissue blot of Fig. 1A. Membrane top coincides with gel top; membrane bottom corresponds to 100 kDa; position of the 220 kDa marker is indicated on the right. Some tissues (testis, liver, stomach, kidney) displayed partial degradation (bands <220 kDa) of the large, 320 kDa LRBA protein. Kidney was repeatedly found particularly proteolysis-prone. All immunolabelled bands are abolished in the brain and kidney samples of LRBA-KO mice, on the right.

**Supplementary Figure 2.**

No electrophysiological dysfunction of the retina is detected in the LRBA-KO.

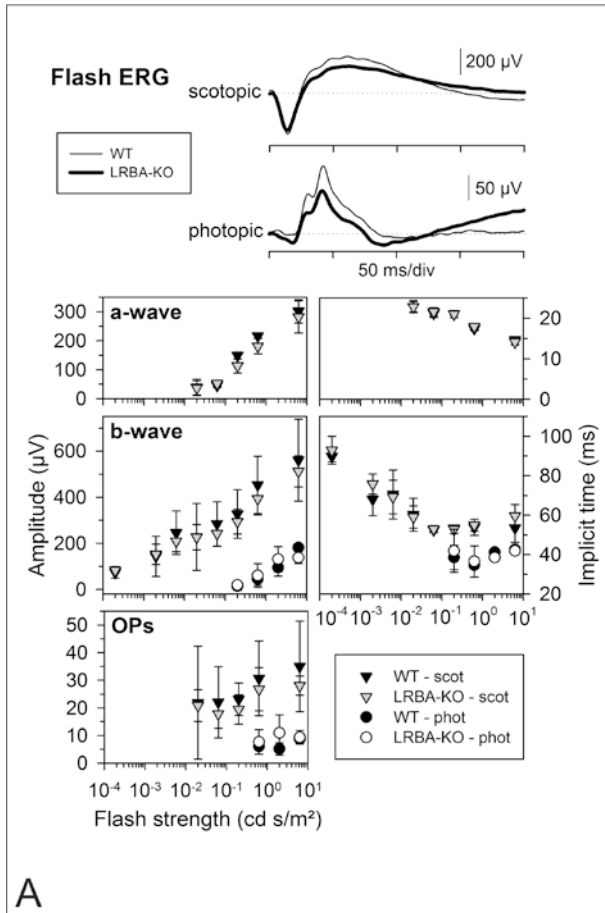

**A**

**(A)** Grouped average flash ERG waveforms (only signals to 6.3  $\text{cd s/m}^2$  shown), and corresponding parameters (amplitudes, left panels; implicit times, right panels) from WT (black symbols,  $n=2$ ) and LRBA-KO mice (grey and white symbols,  $n=4$ ), plotted as a function of flash strength ( $\text{cd s/m}^2$ ). Scotopic and photopic b-wave and OP peak-to-peak values are overlaid in the same panels (triangle and circular symbols, respectively). Note that parameters are shown only at relevant intensities.

**(B)** Fundamental component amplitudes (left panels) and phases (right panels) of flicker ERGs recorded with the different contrast modulations (40–100%, top to bottom panels) are given as a function of temporal frequency.

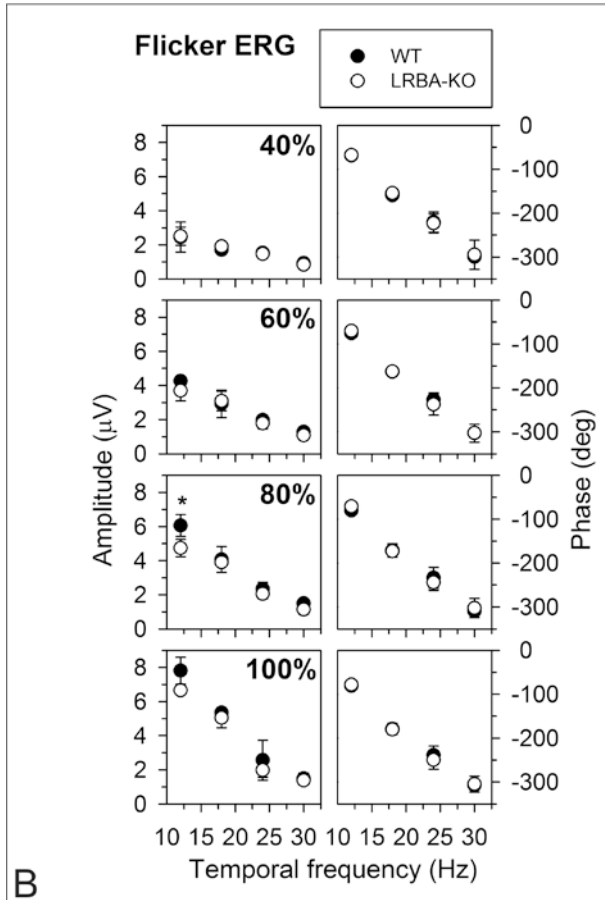

**B**
